# Supplementary material for: Rapid and stable hydrogen detection based on Pd-modified WO3 nanosheets
Source: Royal Society of Chemistry journal article supplement (doi:10.1039/d3dt00338h), 2023-01-01
Supplement: d3dt00338h1.pdf [file d3dt00338h1.pdf]

# Supporting Information

## Rapid and Stable Hydrogen Detection Based on Pd-Modified WO<sub>3</sub> Nanosheets

Jianxin Lv,<sup>a</sup> Linghui Zhang,<sup>a</sup> Lianxi Si,<sup>c</sup> Hui Li,<sup>ab</sup> Wenbo Zhao,<sup>a</sup> Fei An,<sup>d</sup> Xia Feng<sup>a\*</sup> and Shi Hu<sup>ab\*</sup>

- a. Department of Chemistry, School of Science, Tianjin Key Laboratory of Molecular Optoelectronic Science, Tianjin University, Tianjin 300072, China.
- b. Institute of Energy, Hefei Comprehensive National Science Center Hefei, Anhui 230026, China.
- c. School of Chemical Engineering and Technology, Tianjin University, Tianjin 300072, China.
- d. State Key Laboratory of Safety and Control for Chemicals, SINOPEC Research Institute of Safety Engineering Co., Ltd, Songling Road No.339, Qingdao, 266000, China.

### 1. Measurement of hydrogen sensors

Fig.S1 shows the WS-30A gas-sensing system and the volume of test chamber is 18 L. Gas sensing performance can be tested by injecting a certain volume of gas from the gas injection hole. In this work, hydrogen was produced by a hydrogen generator (Success Hydrogen Energy Co., Ltd., Shandong, China). The detailed testing processes are as follows. Firstly, we tested the resistance of hydrogen sensor ( $R_a$ ) in the test chamber filled with air. Then, we injected a certain volume of hydrogen, the hydrogen was mixed with air quickly. The changed resistance could be recorded by the test system. When the resistance value ( $R_g$ ) was stable, we opened the test chamber and the sensor exposed to air again. The gas response was defined as  $S=R_a/R_g$  ( $R_a$  represents initial resistance of the sensor in air and  $R_g$  represents its resistance in the target gas). The response and recovery time were defined as the time needed to reach 90% of the resistance change during gas adsorption and desorption.

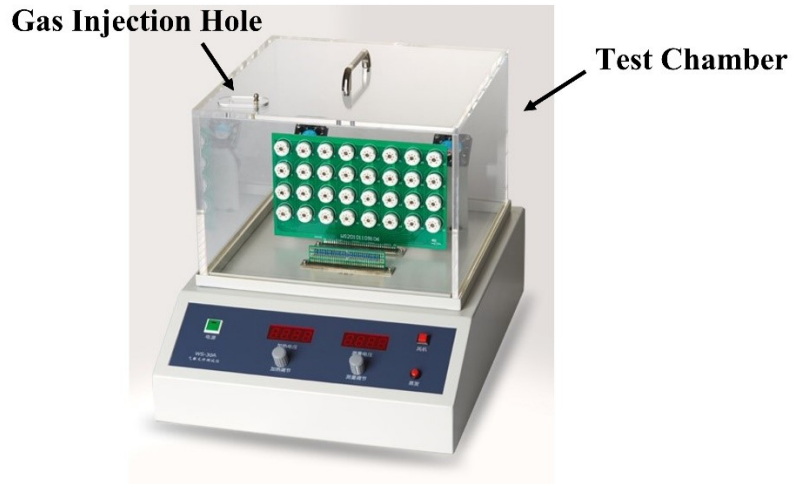

Fig. S1 WS-30A gas-sensing system.

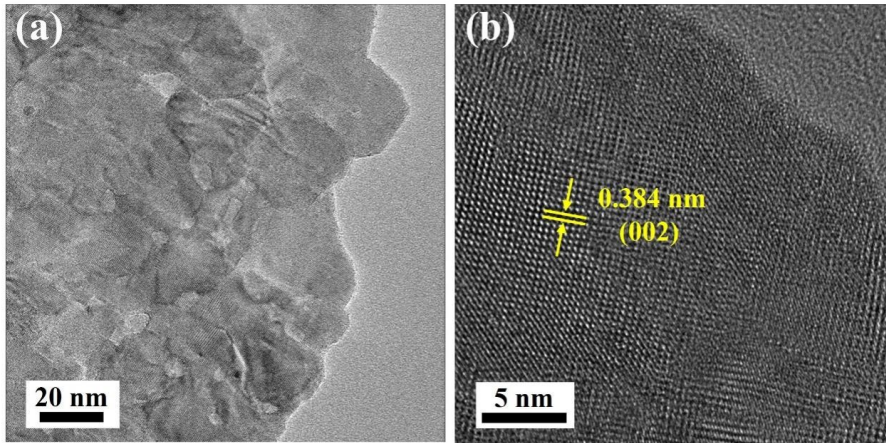

Fig. S2 (a) TEM and (b) HRTEM images of Pd/WO<sub>3</sub>-1 sample.

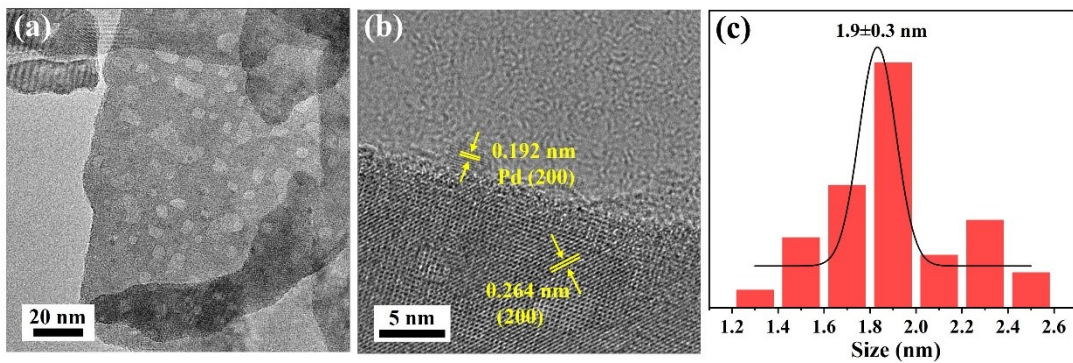

Fig. S3 (a-c) TEM, HRTEM images and corresponding size histogram of Pd/WO<sub>3</sub>-2 sample.

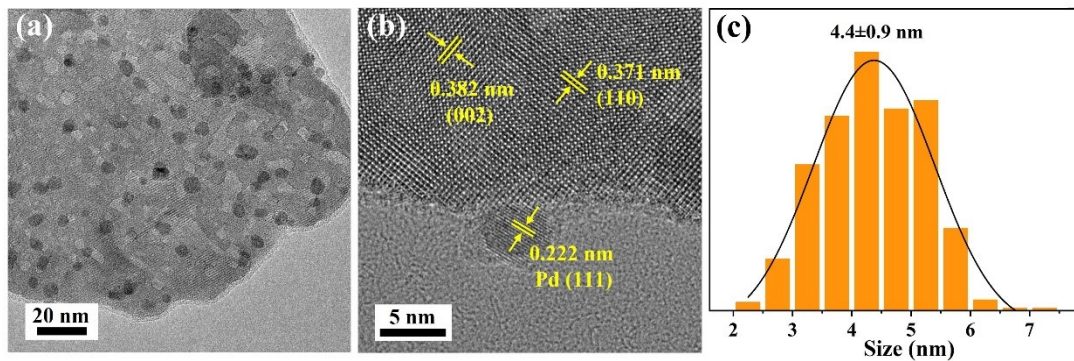

**Fig. S4** (a-c) TEM, HRTEM images and corresponding size histogram of Pd/WO<sub>3</sub>-3 sample.

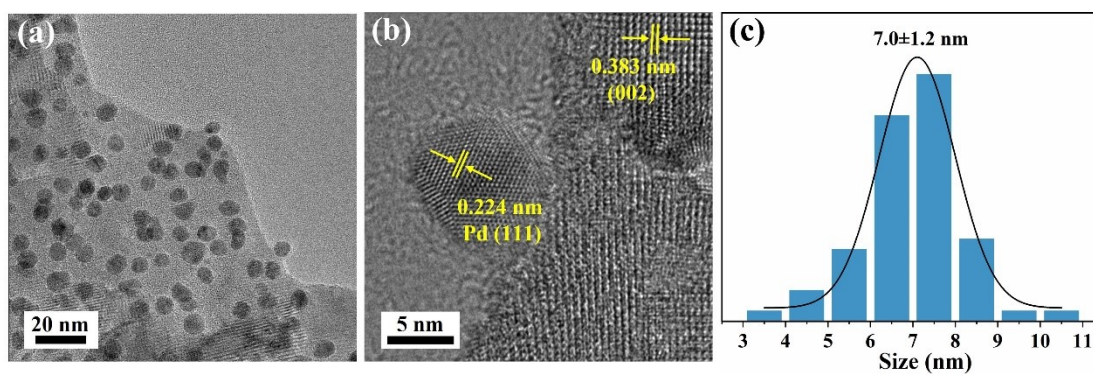

**Fig. S5** (a-c) TEM, HRTEM images and corresponding size histogram of Pd/WO<sub>3</sub>-4 sample.

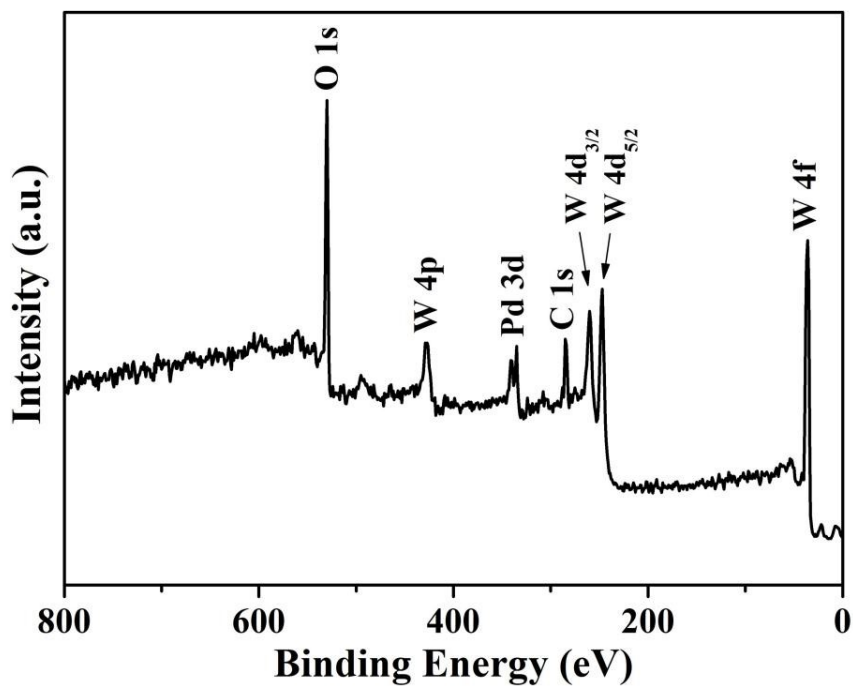

**Fig. S6** XPS spectrum of full survey of Pd/WO<sub>3</sub>-3 sample.

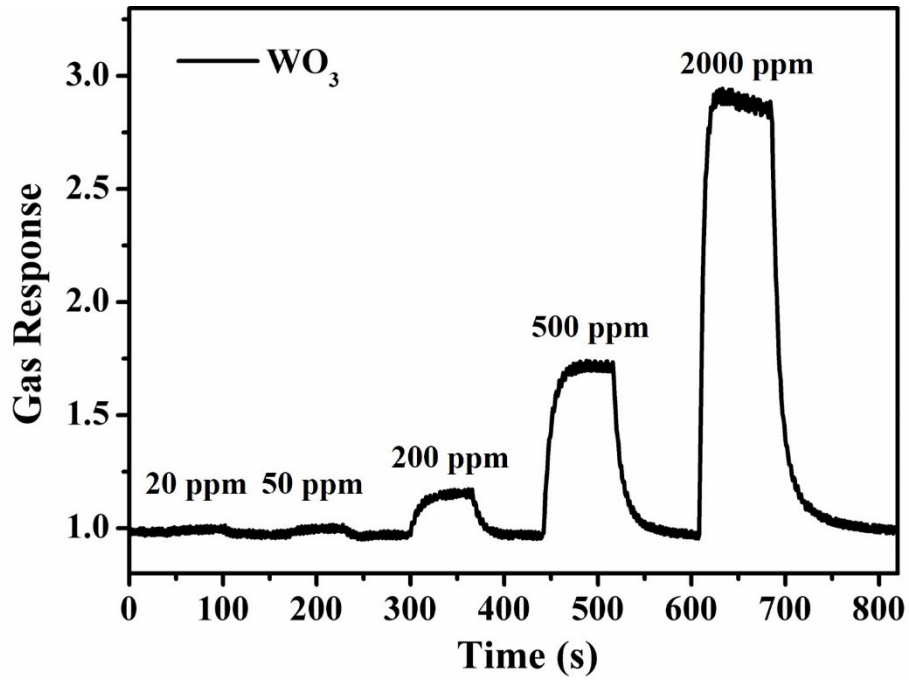

**Fig. S7 (a)** Gas response of  $\text{WO}_3$  sample in the range of 20-2000 ppm of  $\text{H}_2$  under 160 °C.

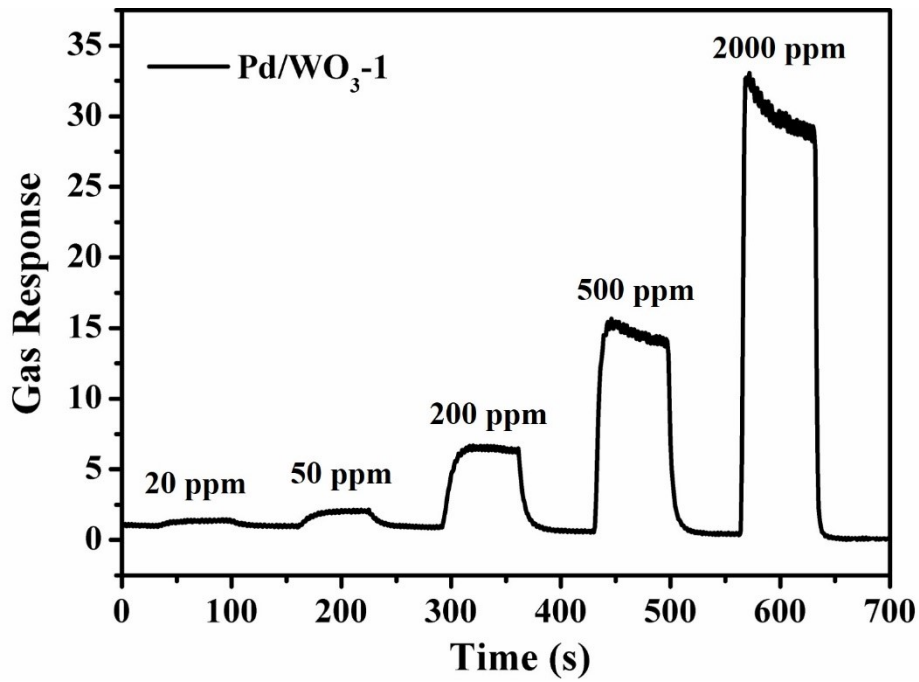

**Fig. S8 (a)** Gas response of  $\text{Pd/WO}_3$ -1 sample in the range of 20-2000 ppm of  $\text{H}_2$  under 160 °C.

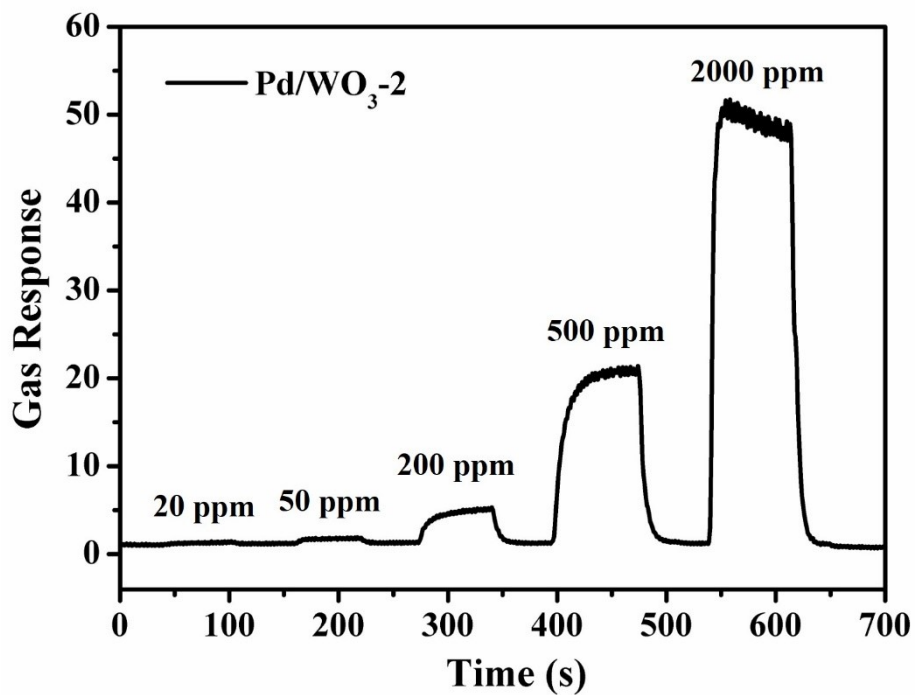

Fig. S9 (a) Gas response of Pd/WO<sub>3</sub>-2 sample in the range of 20-2000 ppm of H<sub>2</sub> under 160 °C.

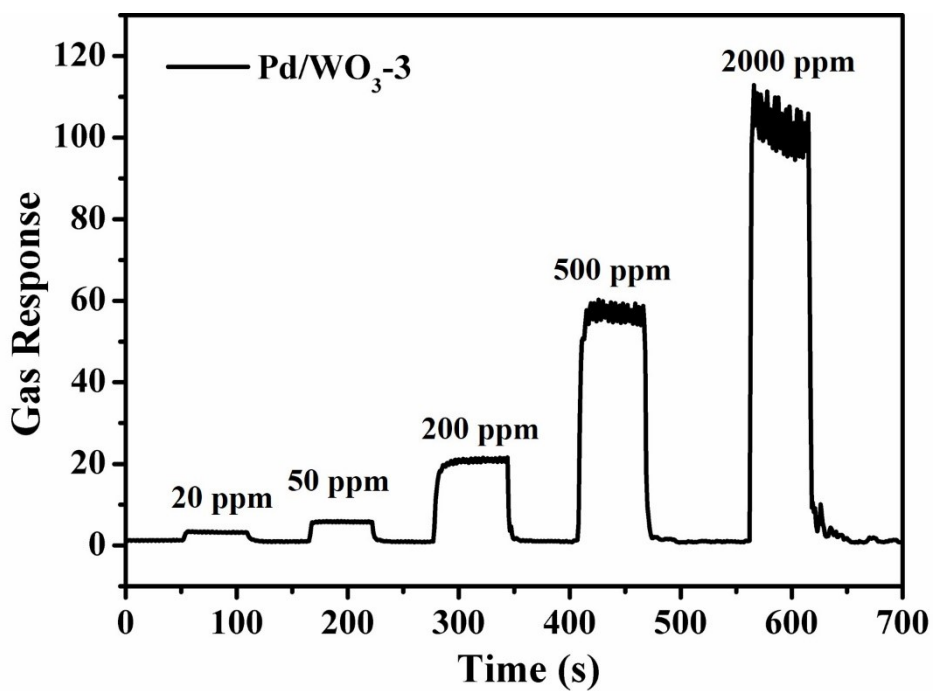

Fig. S10 (a) Gas response of Pd/WO<sub>3</sub>-3 sample in the range of 20-2000 ppm of H<sub>2</sub> under 160 °C.

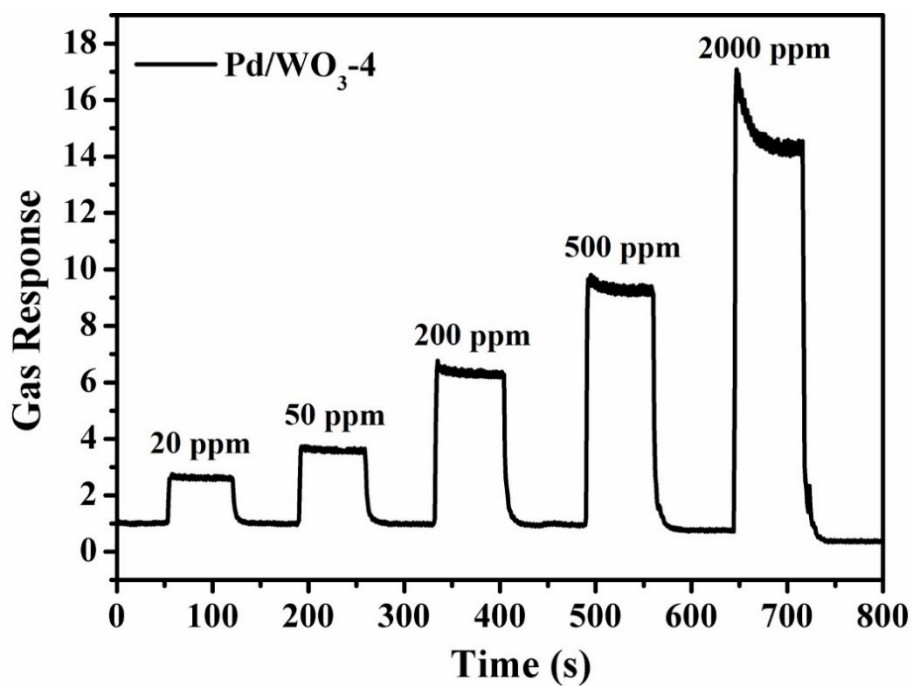

Fig. S11 (a) Gas response of Pd/WO<sub>3</sub>-4 sample in the range of 20-2000 ppm of H<sub>2</sub> under 160 °C.

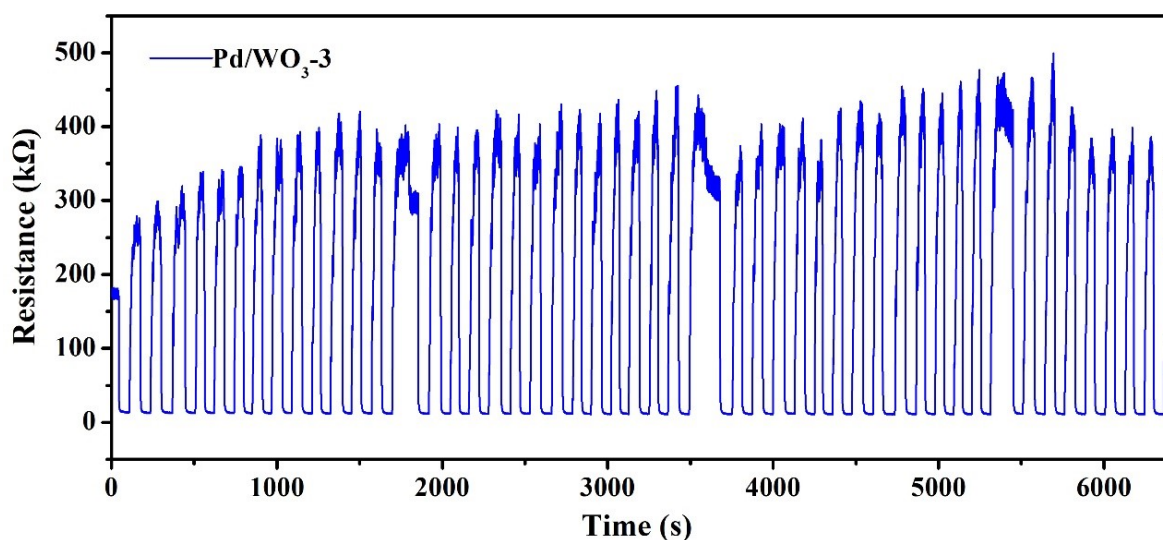

Fig. S12 Resistance of the sensor based Pd/WO<sub>3</sub>-3 to 200 ppm H<sub>2</sub> at 160°C during 50 cycles stability test.

Table S1. Pd content in the samples was measured by ICP.

| Samples               | Pd content |
|-----------------------|------------|
| Pd/WO <sub>3</sub> -1 | 0.19 %     |
| Pd/WO <sub>3</sub> -2 | 0.77 %     |
| Pd/WO <sub>3</sub> -3 | 3.51 %     |
| Pd/WO <sub>3</sub> -4 | 16.07 %    |

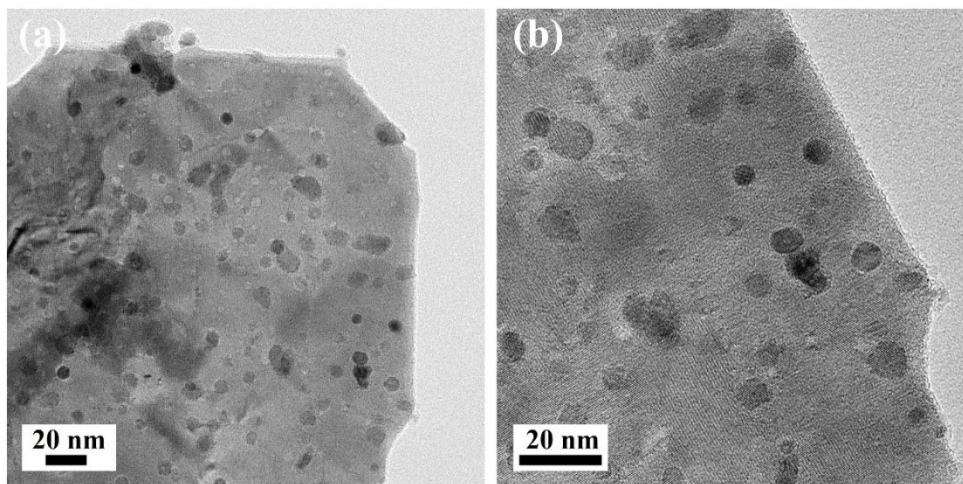

**Fig. S13** (a) and (b) TEM images of Pd/WO<sub>3</sub>-3 sample after all hydrogen sensing test.
